# Supplementary material for: Two novel interpenetrating silver(i) coordination architectures modeled by semi-rigid tetra-pyridinate ligands
Source: Royal Society of Chemistry journal article supplement (doi:10.1039/c2ce26009c), 2012-01-01
Supplement: c2ce26009c.pdf [file c2ce26009c.pdf]

## **Two novel interpenetrating Ag(I) coordination architectures constructed from semi-rigid tetra-pyridinate ligands**

Wen-Jing Yu,<sup>a,‡</sup> Fan Yu,<sup>b,‡</sup> Tao-Tao Ding,<sup>a</sup> Bao Li,<sup>a,\*</sup> Tian-Le Zhang<sup>a,\*</sup>

<sup>a</sup> College of Chemistry and Chemical Engineering, Huazhong University of Science and Technology, Wuhan, Hubei 430074, P. R. China; <sup>b</sup> School of chemistry and environmental engineering, Jiangnan University, Wuhan, Hubei 430056, P.R. China

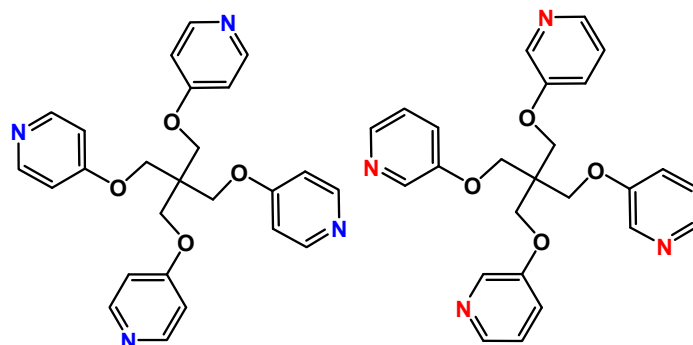

**Scheme S1.** the ligands used in this work

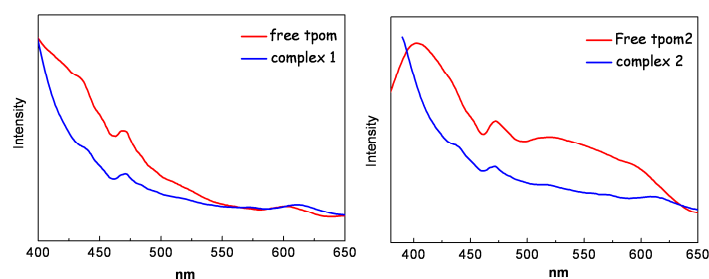

**Figure S2.** luminescent properties of these compounds: The photoluminescent properties of free ligand tpom, tpom2, complex **1** and **2** were investigated. The results show that no obvious intense emissions were observed, except for free ligand tpom2 that exhibits the emission band with a maximum at 402 nm ( $\lambda_{\text{ex}}=360$  nm) which can be ascribed to  $\pi$ - $\pi^*$  transitions of the ligands. However, in complex **2**, no obvious emissions were observed which might be caused by the coordination environment that changes the radiationless pathway.<sup>1</sup>

### Reference

S(1) Valeur, B. Molecular Fluorescence: Principles and Applications; Wiley-VCH: New York, 2001.

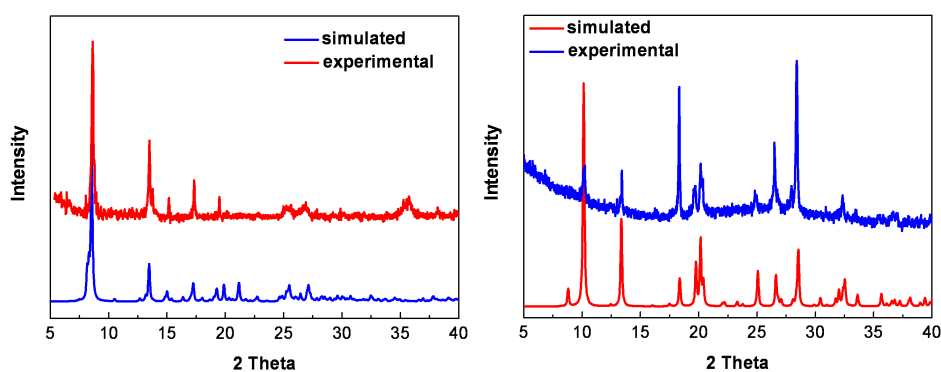

**Figure S3.** XRD spectra of **1** (left) and **2** (right)

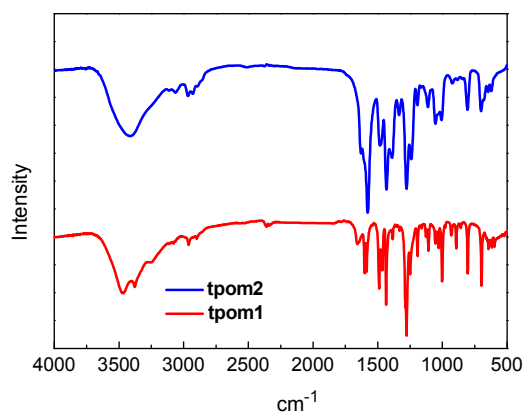

**Figure S4.** IR spectra of tpom1 and tpom2.

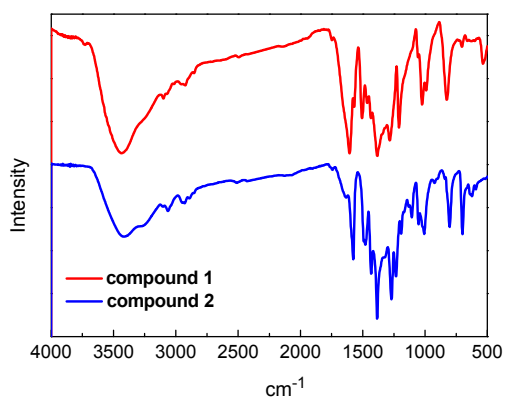

**Figure S5.** IR spectra of 1 and 2
